# Supplementary material for: Electrosynthesis and electrochemical capacitive behavior of a new nitrogen PEDOT analogue-based polymer electrode
Source: Royal Society of Chemistry journal article supplement (doi:10.1039/c5nj02054a), 2016-01-01
Supplement: c5nj02054a1.pdf [file c5nj02054a1.pdf]

**Supporting information**

**Electrosynthesis and electrochemical capacitive behavior of a new nitrogen**

**PEDOT analogue-based polymer electrode**

Zilan Feng §, Daize Mo §, Weiqiang Zhou, Qianjie Zhou, Jingkun Xu \*, Baoyang Lu

\*, Shijie Zhen, Zhipeng Wang, Xiumei Ma

School of Pharmacy, Jiangxi Science and Technology Normal University, Nanchang  
330013, China

\* Corresponding author: Tel: +86-791-88537967; Fax: +86-791-83823320;

Email: xujingkun@tsinghua.org.cn; lby1258@163.com.

§ These authors contributed equally to this work.

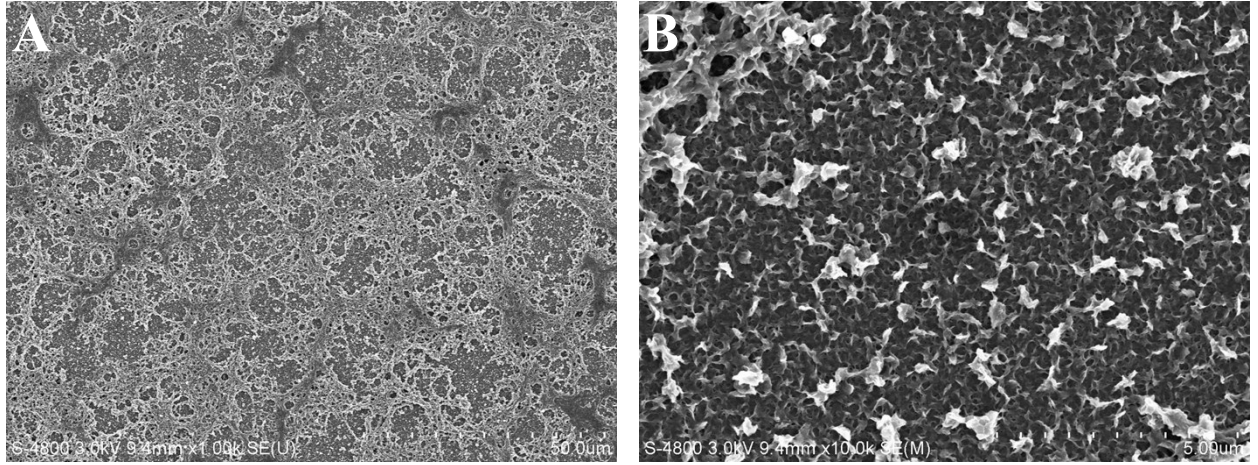

**Fig. S1** SEM images of PMDTO obtained potentiostatically at 0.7 V (vs Ag/AgCl) on ITO electrode for 30 s. Magnification: (A) 1 000 ×, (B) 10 000 ×.

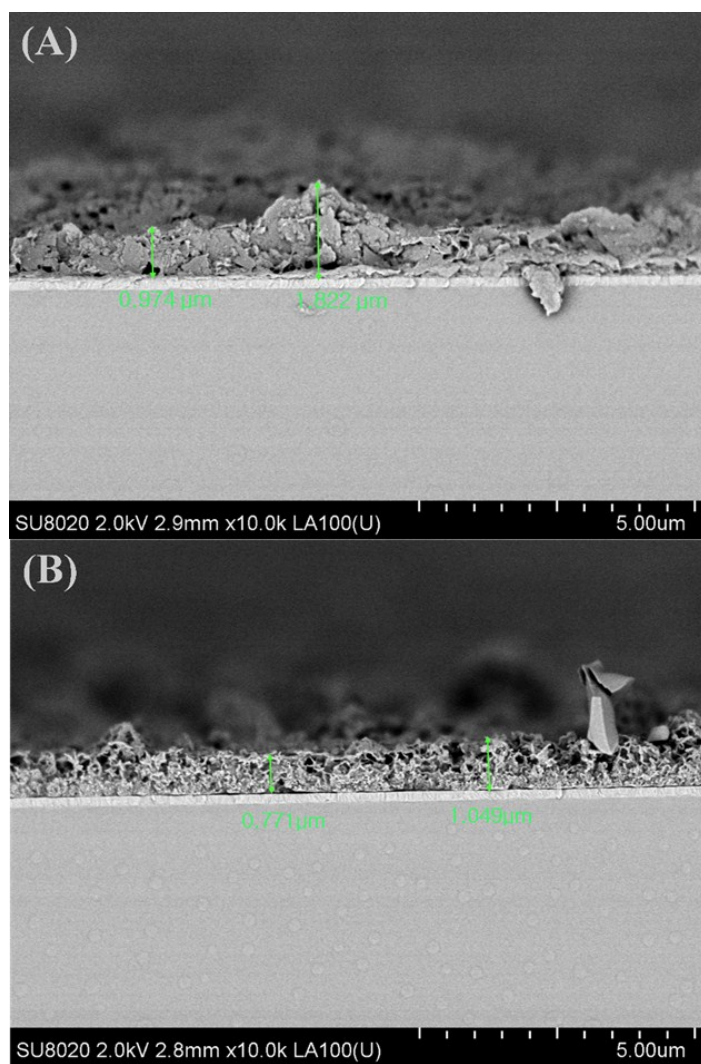

**Fig. S2** SEM image of cross-section of PEDOT (A) and PMDTO (B) films.

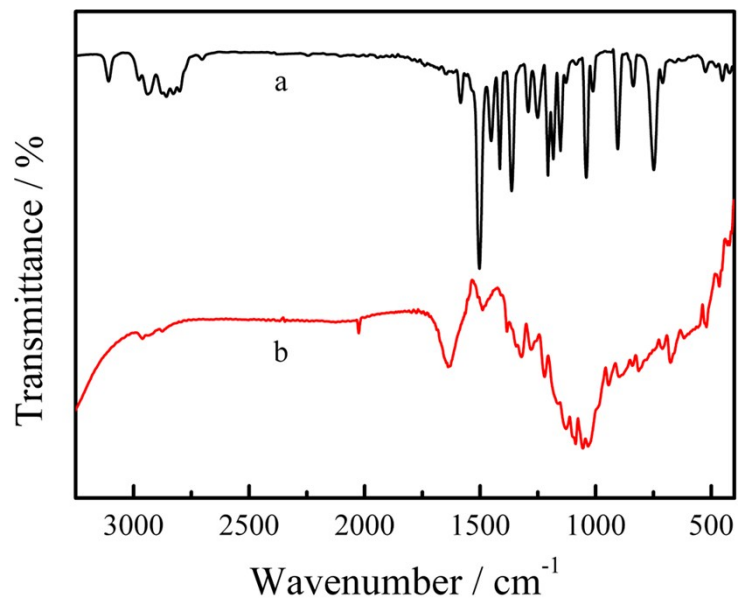

**Fig. S3** FT-IR spectra of the MDTO monomer (a) and the doped PMDTO film (b) obtained potentiostatically at 0.7 V vs Ag/AgCl.

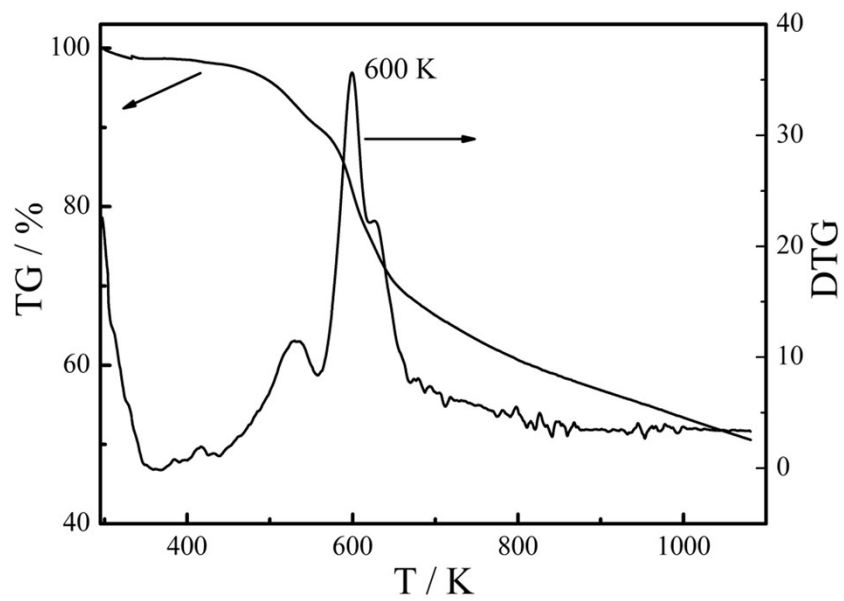

**Fig. S4** TG and DTG curves of PMDTO obtained potentiostatically at 0.7 V vs Ag/AgCl.

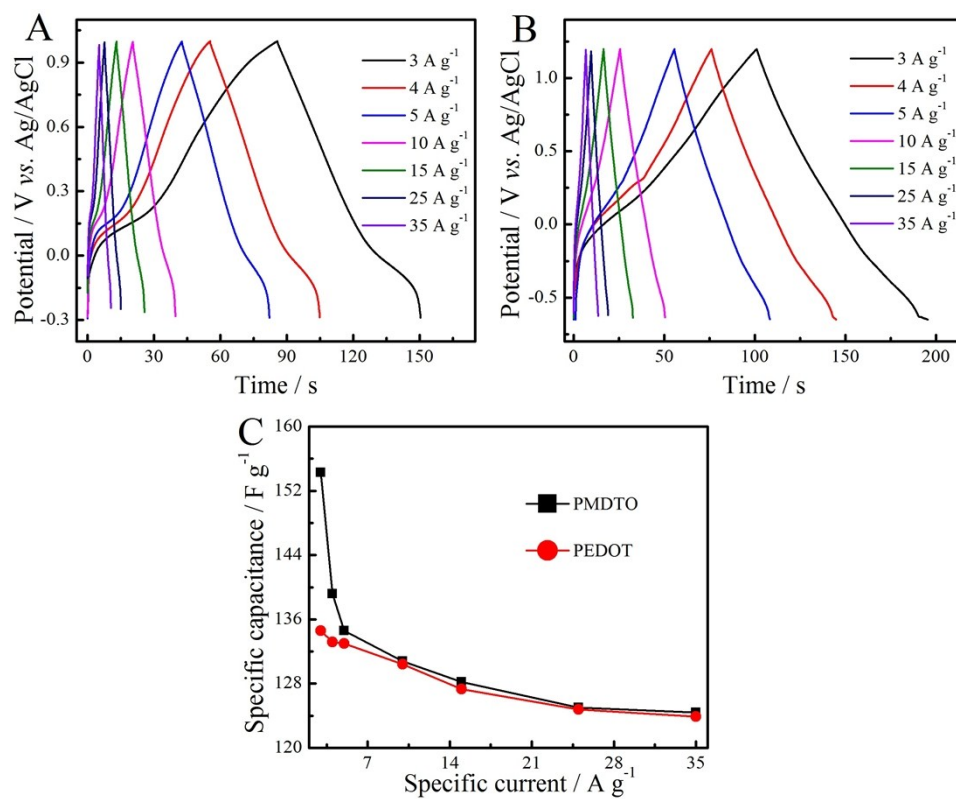

**Fig. S5** Galvanostatic charge/discharge curves of PMDTO (A) and PEDOT (B) in 0.1 mol L<sup>-1</sup> CH<sub>3</sub>CN-Bu<sub>4</sub>NBF<sub>4</sub> at different current densities; (C) Specific capacitance as a function of current density.

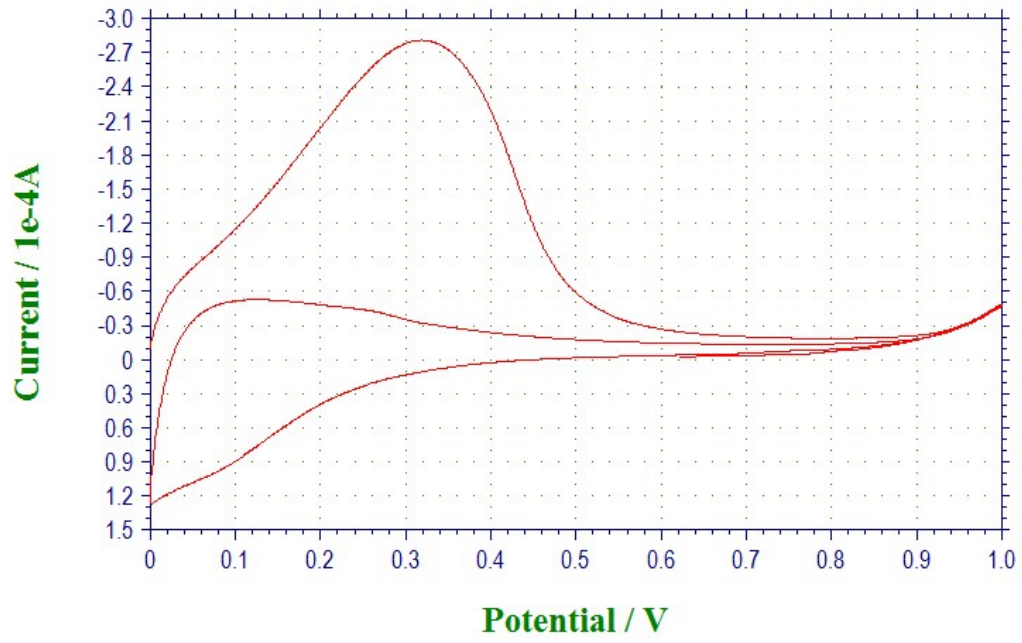

**Fig. S6** Cyclic voltammograms of a symmetric supercapacitor based on two PMDTO electrodes in the potential voltage of 0-1.0 V.
